# Supplementary material for: Epidermolysis-Bullosa-Associated Squamous Cell Carcinomas Support an Immunosuppressive Tumor Microenvironment: Prospects for Immunotherapy
Source: MDPI journal article supplement (doi:10.3390/cancers16020471), 2024-01-22
Supplement: s1 [file s1]

## Supplementary Materials

**Table S1. Disease-causing mutations and clinical characteristics of EB patients**

| Patient | Gender | Mutated gene  | Mutations cDNA           | Mutations protein             | Clinical description of SCCs                           | Therapy                               | Course and outcome of SCC                                                           | Alive age at last visit / Deceased at age (years) |
|---------|--------|---------------|--------------------------|-------------------------------|--------------------------------------------------------|---------------------------------------|-------------------------------------------------------------------------------------|---------------------------------------------------|
| DEB-P1  | F      | <i>COL7A1</i> | c.4888C>T;5743_5744dupCG | p.Arg1630*;Gly1916Valfs*90    | More than 80 SCCs mainly on the limbs                  | Immunotherapy Pembrolizumab Cetuximab | Highly aggressive SCC                                                               | Deceased age 51                                   |
| DEB-P2  | F      | <i>COL7A1</i> | c.425A>G; 425A>G         | p.?:?                         | More than 20 SCC on the limbs                          | Excision                              | Multiple and recurrent                                                              | Alive age 22                                      |
| DEB-P3  | F      | <i>COL7A1</i> | c.497dup;2005C>T         | p.Val168Glyfs*12; Arg669*     |                                                        |                                       |                                                                                     | Deceased age 49                                   |
| DEB-P5  | F      | <i>COL7A1</i> | c.4027C>T;7023G>A        | p.Arg1343*;                   |                                                        |                                       |                                                                                     | Alive age 56                                      |
| DEB-P6  | M      | <i>COL7A1</i> | c.1637-240_3255del4064   | p.?:?                         | Recurrent SCC on both hands                            | Excision                              | Metastasis                                                                          | Deceased age 22                                   |
| DEB-P7  | M      | <i>COL7A1</i> | c.425A>G;425A>G          | p.?:?                         | Recurrent SCC on both hands, legs                      | Excision                              | Squamous cell carcinoma of the esophagus (ref)                                      | Deceased age 42                                   |
| DEB-P8  | F      | <i>COL7A1</i> | c.3551-3T>G;7987G>T      | p.?:Glu2663*                  |                                                        |                                       |                                                                                     | Deceased age 26                                   |
| DEB-P9  | M      | <i>COL7A1</i> | c.425A>G;1837C>T         | p.?:Arg613*                   | Recurrent SCC on the right hand, SCC of the foot       | Excision Cemiplimab, Cetuximab        | Lymph node metastasis, new cutaneous SCC (ref)                                      | Deceased age 28                                   |
| DEB-P10 | M      | <i>COL7A1</i> | c.425A>G;425A>G          | p.?:?                         | Recurrent SCC on the right hand, SCC of the sole, back | Excision Cemiplimab                   | Squamous cell carcinoma of the esophagus Cutaneous SCC stable under Cemiplimab/ref) | Deceased age 42                                   |
| KEB-P1  | M      | <i>FERMT1</i> | c.456dupA;456dupA        | p.Asp153Argfs*4;Asp153Argfs*4 | Lip and oral mucosa                                    | Excision, anti-EGFR (Cetuximab)       | Multiple recurrences, metastasis                                                    | Deceased age 35                                   |

|        |   |               |                     |                   |                      |                                                                       |                                                         |                 |
|--------|---|---------------|---------------------|-------------------|----------------------|-----------------------------------------------------------------------|---------------------------------------------------------|-----------------|
| KEB-P2 | M | <i>FERMT1</i> | c.958-1G>A;958-1G>A | p.??              | Lip                  | Excision                                                              | No recurrence                                           | Alive age 51    |
| KEB-P3 | M | <i>FERMT1</i> | c.958-1G>A;958-1G>A | p.??              | Lip and hand         | Excisions                                                             | Multiple recurrences of the SCC on the hand, metastasis | Deceased age 64 |
| KEB-P4 | M | <i>FERMT1</i> | c.910G>T; 910G>T    | p.Glu304*;Glu304* | Foot (ankle) and leg | Excision, anti-EGFR (Cetuximab), anti-PD-1 (Nivolumab, Pembrolizumab) | Multiple recurrences, metastasis                        | Deceased age 50 |
| KEB-P5 | F | <i>FERMT1</i> | g.80929_89169del    | p.??              | Lip and hand         | Excisions                                                             | Multiple recurrences of the SCC on the lip              | Deceased age 60 |
| KEB-P6 | M | <i>FERMT1</i> | c.1209C>G;1209C>G   | p.Tyr403*;Tyr403* | Hand                 | Excision                                                              | No recurrence                                           | Alive age 61    |
| KEB-P7 | F | <i>FERMT1</i> | c.328C>T;328C>T     | p.Arg110*;Arg110* | Hand                 | Excision                                                              | No recurrence                                           | NA              |

Legend: c., cDNA; F, female; fs, frame shift; g., genomic DNA; M, male; ?, consequence not known; NA, not available

**Table S2. Underlying diseases of the immunosuppressed patients in this study**

|                                            |           |              |
|--------------------------------------------|-----------|--------------|
| <b>Organ transplantation</b>               | <b>34</b> | <b>80.49</b> |
| Kidney                                     | 22        | 53.66        |
| Liver                                      | 1         | 2.44         |
| Lung                                       | 2         | 4.88         |
| Heart                                      | 1         | 2.44         |
| SCT <sup>1</sup>                           | 8         | 17.07        |
| <b>Inflammatory / autoimmune disease</b>   | <b>4</b>  | <b>9.76</b>  |
| Rheumatoid arthritis                       | 2         | 4.88         |
| Psoriasis                                  | 1         | 2.44         |
| Bullous pemphigoid                         | 1         | 2.44         |
| <b>Congenital immune deficiency</b>        | <b>1</b>  | <b>2.44</b>  |
| CD4 <sup>+</sup> T cell defect             | 1         | 2.44         |
| <b>Solid tumour</b>                        | <b>1</b>  | <b>2.44</b>  |
| Squamous cell carcinoma of the nasopharynx | 1         | 2.44         |
| <b>Haematological malignancy</b>           | <b>1</b>  | <b>2.44</b>  |
| B-CLL <sup>2</sup>                         | 1         | 2.44         |

<sup>1</sup>Stem cell transplant; <sup>2</sup>Chronic lymphocytic leukemia.

**Table S3. Immunosuppressive drugs used in the IS<sup>1</sup>-SCC patients in this study**

| Type of immunosuppression                   | Number    | Percentage   |
|---------------------------------------------|-----------|--------------|
| <b>mTOR-Inhibitors</b>                      | <b>5</b>  | <b>12.2</b>  |
| Everolimus                                  | 3         | 7.32         |
| Sirolimus                                   | 2         | 4.88         |
| <b>Calcineurin inhibitors</b>               | <b>24</b> | <b>58.54</b> |
| Tacrolimus                                  | 17        | 41.46        |
| Cyclosporine                                | 7         | 17.07        |
| <b>Purine synthesis inhibitors</b>          | <b>25</b> | <b>60.98</b> |
| Mycophenolic acid                           | 20        | 48.78        |
| Azathioprine                                | 5         | 12.2         |
| <b>Antimetabolites</b>                      | <b>3</b>  | <b>7.32</b>  |
| Methotrexate                                | 3         | 7.32         |
| <b>Alkylating agents</b>                    | <b>1</b>  | <b>2.44</b>  |
| Chlorambucil                                | 1         | 2.44         |
| <b>Alkylating-like agent</b>                | <b>1</b>  | <b>2.44</b>  |
| Cisplatin                                   | 1         | 2.44         |
| <b>Proteasome inhibitor</b>                 | <b>1</b>  | <b>2.44</b>  |
| Bortezomib                                  | 1         | 2.44         |
| <b>NA<sup>2</sup></b>                       | <b>3</b>  | <b>7.32</b>  |
| <b>Combination therapy</b>                  | <b>23</b> | <b>56.1</b>  |
| Cyclosporine + Mycophenolic acid            | 4         | 9.76         |
| Tacrolimus + Mycophenolic acid              | 14        | 34.15        |
| Tacrolimus + Everolimus + Mycophenolic acid | 1         | 2.44         |
| Tacrolimus + Azathioprine                   | 1         | 2.44         |
| Sirolimus + Mycophenolic acid               | 2         | 4.88         |
| Everolimus + Tacrolimus                     | 1         | 2.44         |

<sup>1</sup>immunosuppressed; <sup>2</sup>not available.

**Table S4. Immunohistochemical staining reagents and methods**

| Primary antibody | Source                    | Antigen retrieval                | Primary antibody incubation | Detection                                                                                                                                                                                               |
|------------------|---------------------------|----------------------------------|-----------------------------|---------------------------------------------------------------------------------------------------------------------------------------------------------------------------------------------------------|
| IDO              | Cell Signaling Technology | TRS <sup>1</sup> , pH 9.0 (Dako) | 60 min, RT                  | Biotin-conjugated secondary antibody (Dako REAL™ Link, Biotinylated Secondary Antibodies) visualized with a alkaline phosphatase/RED chromogen (Dako REAL™ Detection System, Rabbit/Mouse (Code K5005)) |
| PD-1             | R&D                       | TRS, pH 6.0 (Dako)               | 60 min, RT                  | Biotin-conjugated secondary rabbit anti-goat antibody (vector Labs) visualized with a alkaline phosphatase/RED chromogen (Dako REAL™ Detection System, Rabbit/Mouse (Code K5005))                       |
| PD-L1            | Cell Signaling Technology | TRS, pH 9.0 (Dako)               | 60 min, RT                  | Biotin-conjugated secondary antibody (Dako REAL™ Link, Biotinylated Secondary Antibodies) visualized with a alkaline phosphatase/RED chromogen (Dako REAL™ Detection System, Rabbit/Mouse (Code K5005)) |
| CD4              | Invitrogen                | TRS, pH 9.0 (Dako)               | 60 min, RT                  | Biotin-conjugated secondary antibody (Dako REAL™ Link, Biotinylated Secondary Antibodies) visualized with a alkaline phosphatase/RED chromogen (Dako REAL™ Detection System, Rabbit/Mouse (Code K5005)) |
| CD8              | Biolegend                 | TRS, pH 9.0 (Dako)               | 60 min, RT                  | Biotin-conjugated secondary antibody (Dako REAL™ Link, Biotinylated Secondary Antibodies) visualized with a alkaline phosphatase/RED chromogen (Dako REAL™ Detection System, Rabbit/Mouse (Code K5005)) |
| CD68             | Biolegend                 | TRS pH 9.0 (Dako)                | 60 min, RT                  | Biotin-conjugated secondary antibody (Dako REAL™ Link, Biotinylated Secondary Antibodies) visualized with a alkaline phosphatase/RED chromogen (Dako REAL™ Detection System, Rabbit/Mouse (Code K5005)) |
| LAG-3            | Novus Biologicals         | TRS, pH 9.0 (Dako)               | 60 min, RT                  | Biotin-conjugated secondary antibody (Dako REAL™ Link, Biotinylated Secondary Antibodies) visualized with a alkaline phosphatase/RED chromogen (Dako REAL™ Detection System, Rabbit/Mouse (Code K5005)) |
| TIM-3            | Cell Signaling Technology | TRS, pH 9.0 (Dako)               | 60 min, RT                  | Biotin-conjugated secondary antibody (Dako REAL™ Link, Biotinylated Secondary Antibodies) visualized with a alkaline phosphatase/RED chromogen (Dako REAL™ Detection System, Rabbit/Mouse (Code K5005)) |

<sup>1</sup>target retrieval solution.

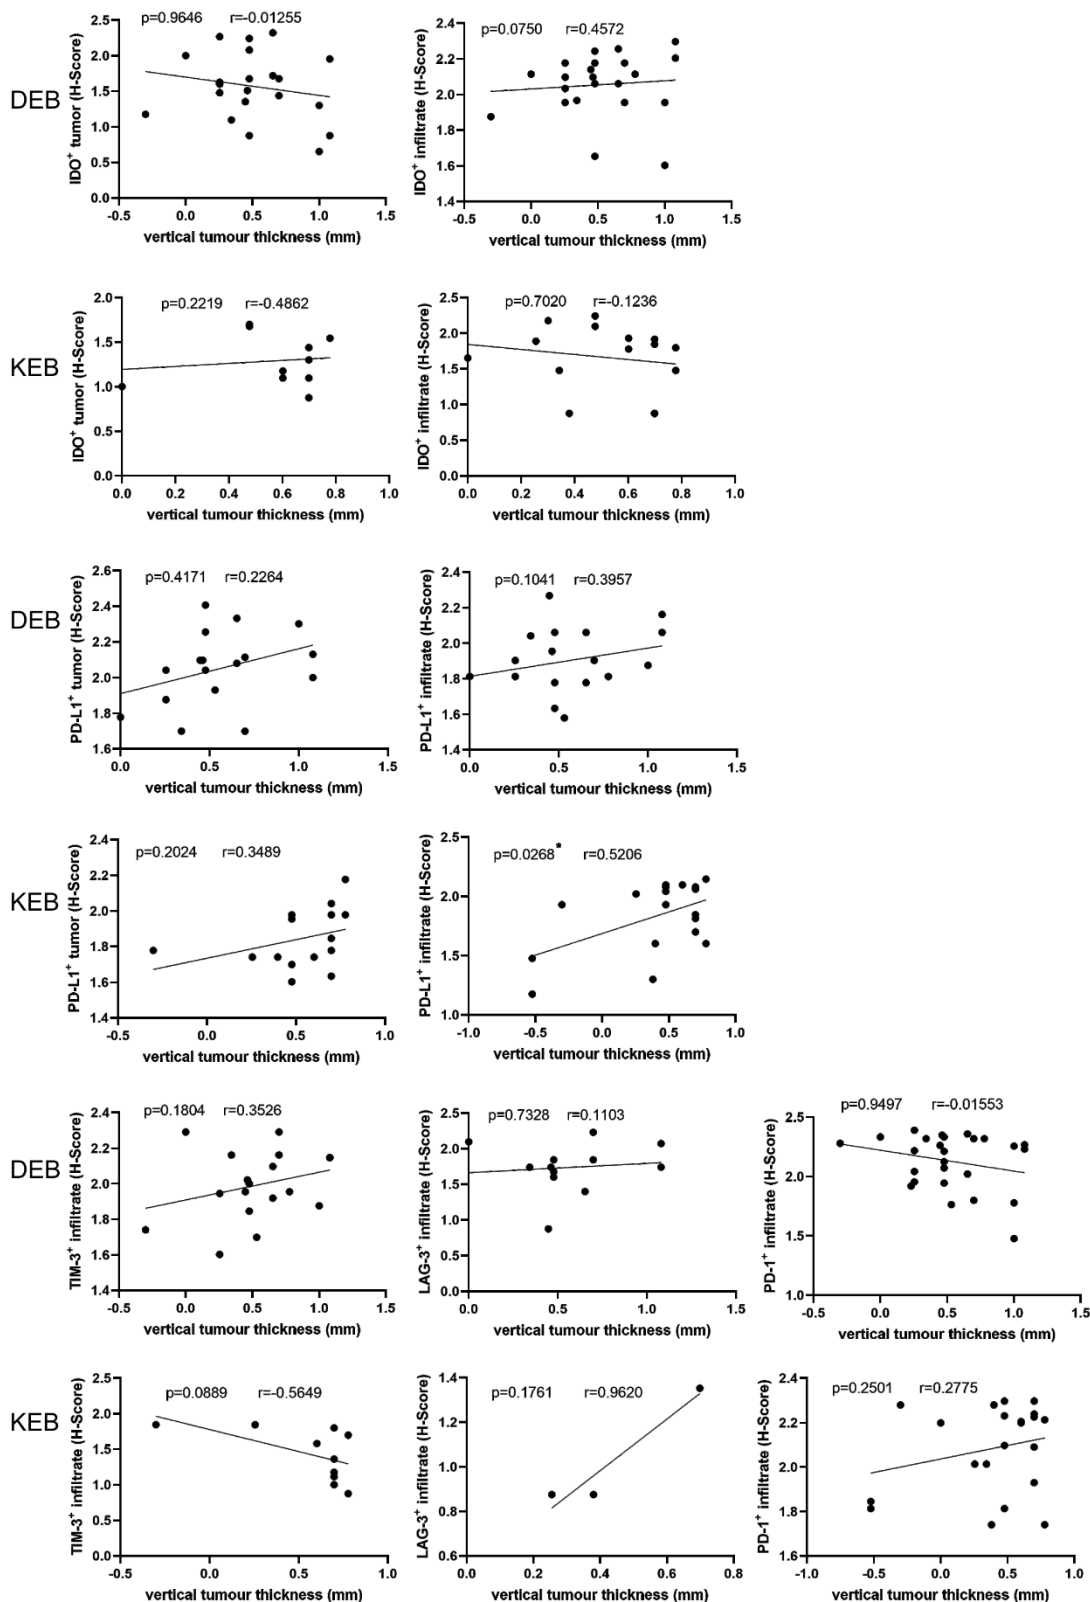

**Figure S1: Correlation of immune marker expression with vertical tumor thickness.** Statistical analysis shows how the expression of the markers (y-axis) in tumor cells and stromal cells is affected by vertical tumor thickness (x-axis) using a simple linear regression model. DEB=dystrophic epidermolysis bullosa, KEB=Kindler epidermolysis bullosa, Statistical significance was noted as \*p<0.05, \*\*p<0.01, \*\*\*p<0.001. r=pearson correlation coefficient. Measured values of X and Y-axis were logarithmized before statistical analysis.
